# Supplementary material
Source: HighWire-hosted journal article supplement (https://www.canjsurg.ca/highwire/filestream/96778/field_highwire_adjunct_files/0/cjs-017412-1-at.pdf)
Supplement: cjs-017412-1-at.pdf [file cjs-017412-1-at.pdf]

**Appendix 1** to Ma GW, Pooni A, Forbes SS, et al. Quality of inguinal hernia operative reports: room for improvement. *Can J Surg* 2013;56(6).

DOI: 10.1503/cjs.017412

Copyright © 2013 The Author(s) or their employer(s). To receive this resource in an accessible format, please contact us at [cmajgroup@cmaj.ca](mailto:cmajgroup@cmaj.ca).

**Table S1. Demographic, intraoperative, hernia and repair-specific details included in 206 operative reports**

| Detail                                          | Completeness;<br>no. (%) | Detail                                             | Completeness;<br>no. (%) |
|-------------------------------------------------|--------------------------|----------------------------------------------------|--------------------------|
| Demographic                                     |                          | Hernia (continued)                                 |                          |
| Date of operation                               | 200 (97.1)               | Testicle pulled down at end of case                | 27 (13.6)                |
| Date of dictation                               | 206 (100)                | Ilioinguinal nerve block (whether performed)       | 68 (33.0)                |
| Person dictating the operative report           | 206 (100)                | Incarcerated hernia (if yes, whether bowel viable) | 22 (10.7)                |
| Surgeons                                        | 206 (100)                | Repair-specific                                    |                          |
| Assistants                                      | 179 (86.9)               | Prolene hernia system, <i>n</i> = 35               |                          |
| Patient date of birth                           | 100 (48.5)               | Underlay mesh inserted                             | 33 (94.3)                |
| Patient sex                                     | 184 (89.3)               | Onlay mesh placed                                  | 34 (97.1)                |
| Intraoperative                                  |                          | Mesh tacked to inguinal ligament, conjoint tendon  | 26 (74.3)                |
| DVT prophylaxis                                 | 4 (1.9)                  | Lichtenstein, <i>n</i> = 26                        |                          |
| Preoperative antibiotics                        | 24 (11.7)                | Patch tacked                                       | 20 (76.9)                |
| Type of anesthetic                              | 199 (96.6)               | Conjoint tendon                                    | 16 (61.5)                |
| Operative urgency                               | 50 (24.3)                | Inguinal ligament                                  | 17 (65.4)                |
| Complications (whether any occurred)            | 61 (29.6)                | Pubic tubercle                                     | 19 (73.1)                |
| Skin closure                                    | 200 (97.1)               | Recreated ring                                     | 11 (42.3)                |
| Hernia                                          |                          | Plug-and-patch, <i>n</i> = 109                     |                          |
| Preoperative diagnosis                          | 191 (92.7)               | Location of plug                                   | 73 (67.0)                |
| Procedure (e.g., hernia repair)                 | 200 (97.1)               | Plug sutured                                       | 99 (90.8)                |
| Side                                            | 204 (99.0)               | Patch tacked                                       | 105 (96.3)               |
| Postoperative diagnosis                         | 187 (90.8)               | Conjoint tendon                                    | 46 (42.2)                |
| Hernia type (e.g., indirect, direct, pantaloon) | 160 (77.7)               | Inguinal ligament                                  | 51 (46.8)                |
| Occurrence (first repair v. recurrent)          | 17 (8.3)                 | Pubic tubercle                                     | 60 (55.1)                |
| Type of repair (name of repair specified)       | 197 (95.6)               | Recreated ring                                     | 40 (36.7)                |
| Hernia sac                                      | 154 (74.8)               | Bassini, <i>n</i> = 2                              |                          |
| Cord explored                                   | 66 (32.0)                | Conjoint tendon sutured to inguinal ligament       | 1 (50.0)                 |
| Cord structures identified                      | 78 (37.9)                | McVay, <i>n</i> = 4                                |                          |
| Division of round ligament                      | 193 (23.5)               | Conjoint tendon sutured to Coopers Ligament        | 2 (50.0)                 |
| Ligation of round ligament                      | 193 (23.5)               | Transition stitch                                  | 0 (0)                    |
| Exterior oblique closed                         | 180 (87.4)               | Conjoint tendon sutured to Inguinal Ligament       | 0 (0)                    |
| Method of fixation (type of suture used)        | 185 (89.8)               | Shouldice, <i>n</i> = 23                           |                          |
| Ilioinguinal nerve identified                   | 96 (46.6)                | Transversalis fascia divided                       | 19 (82.6)                |
| Ilioinguinal nerve divided                      | 75 (36.4)                | Conjoint tendon sutured to Inguinal Ligament       | 19 (82.6)                |

DVT = deep vein thrombosis.
